# Supplementary material for: A three gene signature predicts response to selinexor in multiple myeloma
Source: bioRxiv or medRxiv preprint supplement (doi:10.1101/2022.02.25.22271401), 2022-03-08

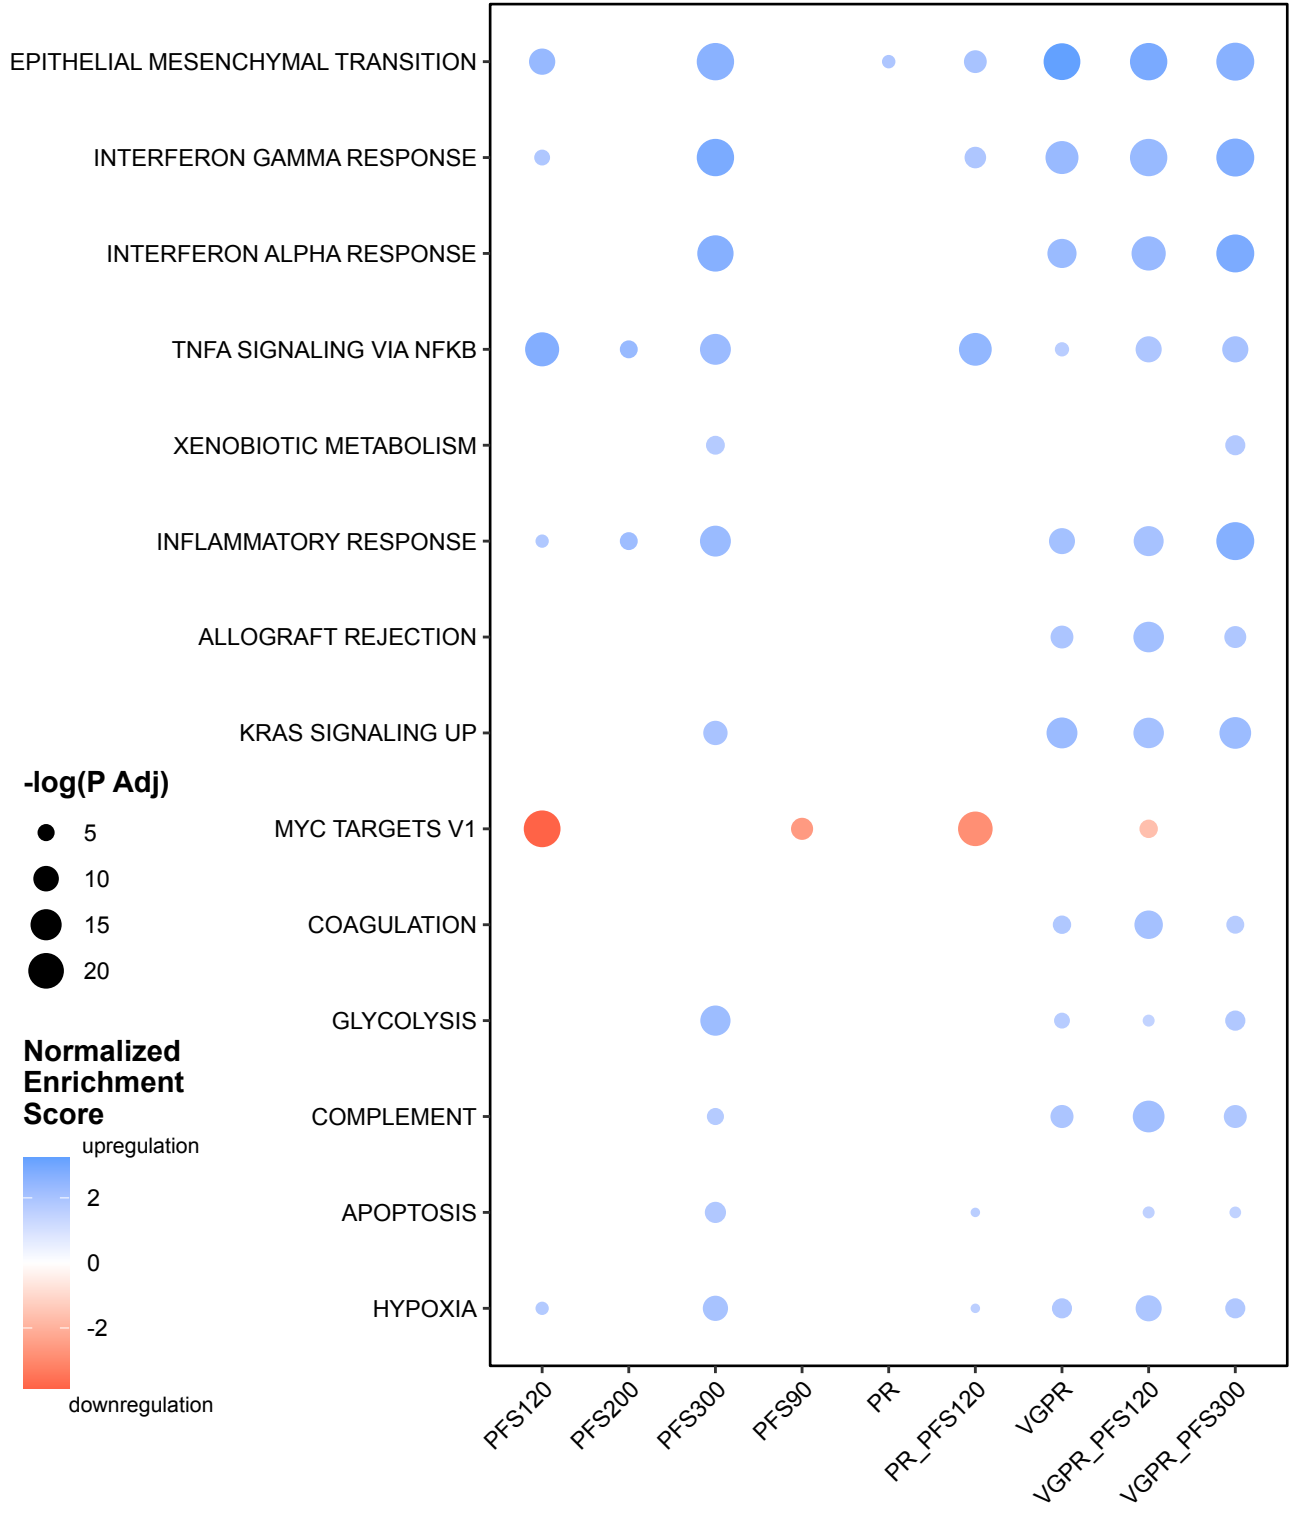

Supplement: Supplementary file [file media-1.pdf]
